# Supplementary material for: Synthesis, Characterization, and BSA-Binding Studies of Novel Sulfonated Zinc-Triazine Complexes
Source: Hindawi journal article supplement (doi:10.1155/2018/7563820), 2018-01-01
Supplement: f1 [file 7563820.f1.pdf]

## Supporting Information

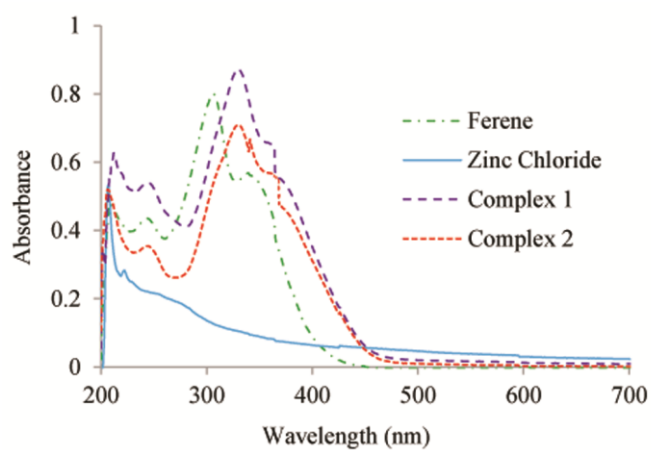

**FIGURE S1.** UV-Visible spectra of ZnCl<sub>2</sub>, ferene, and complexes **1** and **2**

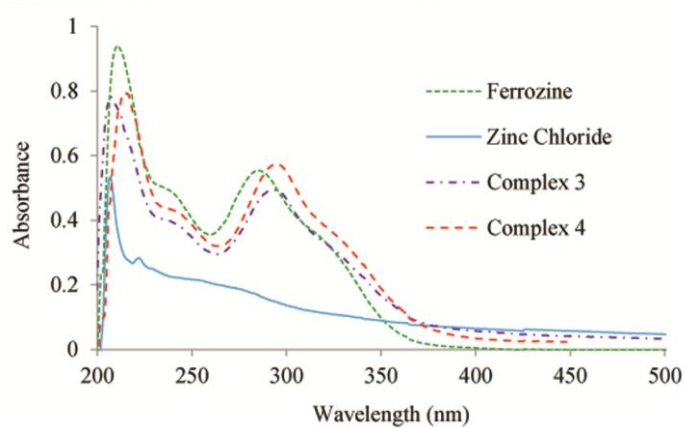

**FIGURE S2.** UV-Visible Spectra of ZnCl<sub>2</sub>, ferrozine, and complexes **3** and **4**
